# Supplementary material for: The Expression and Function of Tubulin Isotypes in Caenorhabditis elegans
Source: Front Cell Dev Biol. 2022 Mar 24;10:860065. doi: 10.3389/fcell.2022.860065 (PMC8987236; doi:10.3389/fcell.2022.860065)
Supplement: Supplementary file 1 [file Table1.xlsx]

## Sheet: Sheet1
Gene.name	Gene.ID	ADA	ADE	ADF	ADL	AFD	AIA	AIB	AIM	AIN	AIY	AIZ	ALA	ALM	ALN	AQR	AS	ASEL	ASER	ASG	ASH	ASI	ASJ	ASK	AUA	AVA	AVB	AVD	AVE	AVF	AVG	AVH	AVJ	AVK	AVL	AVM	AWA	AWB	AWC_OFF	AWC_ON	BAG	BDU	CAN	CEP	DA	DA9	DB	DB01	DVA
tba-1	WBGene00006528	108.802	896.551	97.953	54.412	186.068	334.9	99.08	181.181	251.726	134.1	514.31	866.27	196.395	78.002	397.137	1305.21	199.718	208.302	264.834	93.269	244.834	96.099	85.551	159.242	1481.4	797.79	1394.73	393.372	1890.97	1190.01	769.235	1306.88	233.003	819.481	375.634	206.67	139.395	230.177	220.338	200.936	672.979	828.057	853.197	2536.66	1431.14	2369.02	2448.32	1111.18
tba-2	WBGene00006529	232.486	458.426	135.231	142.256	177.599	0	190.158	193.918	0	153.342	443.375	261.066	129.815	0	350.531	900.495	196.81	420.812	380.968	0	230.631	126.358	185.733	244.902	548.912	635.573	757.166	211.157	455.675	693.856	326.664	493.821	154.877	344.716	233.857	189.356	338.061	359.414	240.926	235.742	519.053	705.321	563.581	1506.54	709.442	1148.05	1077.43	396.137
mec-12	WBGene00003175	623.69	756.217	297.273	206.043	419.423	303.337	163.284	593.394	836.212	342.023	412.203	12031.3	94420.9	1427.62	309.922	2126.67	763.631	291.384	203.971	292.579	259.026	106.476	155.247	398.036	7741.67	6994.52	11136.4	6736.54	1829.32	4476.55	4974.68	16890.3	2157.02	5723.1	43035.2	549.69	532.785	280.275	80.983	1218.61	3988	6889.85	2982.77	4636.11	8812.31	6326.26	4625.12	6432.96
tba-4	WBGene00006530	0	0	0	0	0	0	0	0	0	0	0	0	0	0	31.363	0	0	0	0	0	0	35.019	0	0	0	0	0	0	0	0	0	0	0	0	0	0	0	0	0	0	79.681	0	77.535	0	0	0	0	0
tba-5	WBGene00006531	0	0	57.972	21.683	0	0	0	0	0	0	0	0	0	0	0	0	18.169	57.815	97.351	23.318	53.596	42.211	61.656	0	0	0	0	0	0	0	0	0	0	0	0	28.347	0	0	0	0	0	0	0	0	0	0	0	0
tba-6	WBGene00006532	0	0	0	0	0	0	0	0	0	0	0	0	0	0	0	0	0	0	0	0	0	0	0	0	0	0	0	0	0	0	0	0	0	0	0	0	0	0	0	0	0	0	0	0	0	0	0	0
tba-7	WBGene00006533	0	0	0	0	0	0	0	0	0	0	0	0	0	0	0	0	0	0	0	0	0	0	0	0	0	0	0	0	0	0	0	0	0	0	0	0	0	0	0	0	0	0	0	0	0	0	0	0
tba-8	WBGene00006534	0	0	0	0	0	0	0	0	0	0	0	0	0	0	0	0	0	0	0	0	0	0	0	0	0	0	0	0	0	0	0	0	0	0	0	8.753	0	0	0	0	0	0	0	0	0	0	0	0
tba-9	WBGene00006535	0	1033.15	0	0	0	0	0	0	0	639.825	0	0	0	0	0	0	0	0	0	0	0	0	0	0	0	0	0	0	0	0	0	0	0	114.944	0	287.849	0	316.894	344.732	223.982	0	0	3317.04	0	0	0	0	0
tbb-1	WBGene00006536	0	0	61.829	98.807	70.076	0	121.626	96.229	0	60.61	248.872	110.541	54.007	0	105.221	207.174	0	182.95	136.768	0	104.22	89.813	79.354	0	127.06	76.881	144.764	131.753	0	105.214	129.689	128.71	0	114.707	71.209	48.52	140.295	151.429	101.466	104.224	193.794	308.931	187.556	267.013	229.24	187.25	228.423	71.951
tbb-2	WBGene00006537	269.513	1889.81	276.717	224.35	322.097	341.752	238.58	288.632	285.009	196.063	771.988	1131.6	554.152	117.904	721.547	1632.11	257.792	274.911	623.192	249.47	309.824	159.486	244.499	307.454	1899.4	1289.33	2130.59	841.354	941.317	1586.13	750.876	1339.59	545.085	787.478	344.233	321.975	240.814	651.26	467.178	196.435	1183.25	1261.37	1910.82	3518.99	1194.6	3530.21	3337.09	1182.86
mec-7	WBGene00003171	0	0	0	0	0	0	0	0	0	0	0	399.847	135941	0	0	0	0	0	0	0	0	0	0	0	0	0	0	0	6020.88	0	2039.07	844.408	0	1161.96	66448	0	0	0	0	0	1725.1	0	0	0	0	0	0	0
tbb-4	WBGene00006538	0	101.14	168.005	113.266	0	0	0	0	0	0	0	0	0	0	159.947	0	102.08	255.635	172.273	49.959	150.616	102.699	114.421	0	0	0	0	0	0	0	0	0	0	0	0	0	167.894	0	0	0	0	0	1094.47	0	0	0	0	0
ben-1	WBGene00000248	0	388.301	0	0	0	0	0	0	0	0	213.891	354.621	176.821	0	0	490.33	0	0	0	0	0	0	0	0	324.377	262.906	1056.26	0	555.248	492.341	163.16	597.511	235.065	267.632	81.306	0	0	0	0	0	540.72	80.3	565.46	862.996	246.796	647.421	548.789	281.993
tbb-6	WBGene00006539	0	58.035	0	63.21	0	0	0	0	0	0	0	0	0	0	92.722	0	0	0	0	0	46.979	20.153	0	0	0	0	74.614	0	0	0	0	0	0	0	0	0	0	0	0	0	0	0	202.05	0	0	0	0	0
tbg-1	WBGene00006540	25.1861	11.5432	6.82793	16.7619	7.14914	4.99192	25.1318	3.42889	36.69	36.6805	6.06834	13.9316	3.41057	0	3.50572	15.1441	6.09534	6.68542	8.45293	6.82595	21.3783	8.89005	3.34459	33.5745	13.3745	5.93072	51.068	9.68335	33.126	9.31245	10.1293	19.4881	5.5022	14.1767	0	20.3607	7.43745	28.1431	13.2301	2.64572	7.33057	18.262	1.41188	14.1868	0	11.7357	10.0971	16.146
[truncated: 80 more columns]
